# Supplementary material for: The Change of Lumbar Spinal Stenosis Symptoms over a Six-Year Period in Community-Dwelling People
Source: MDPI journal article supplement (doi:10.3390/medicina57101116), 2021-10-16
Supplement: s1 [file s1]

Fig. 1S. Time course of LSS-symptom for six-year duration; Subjects without either knee or hip OA in 2004

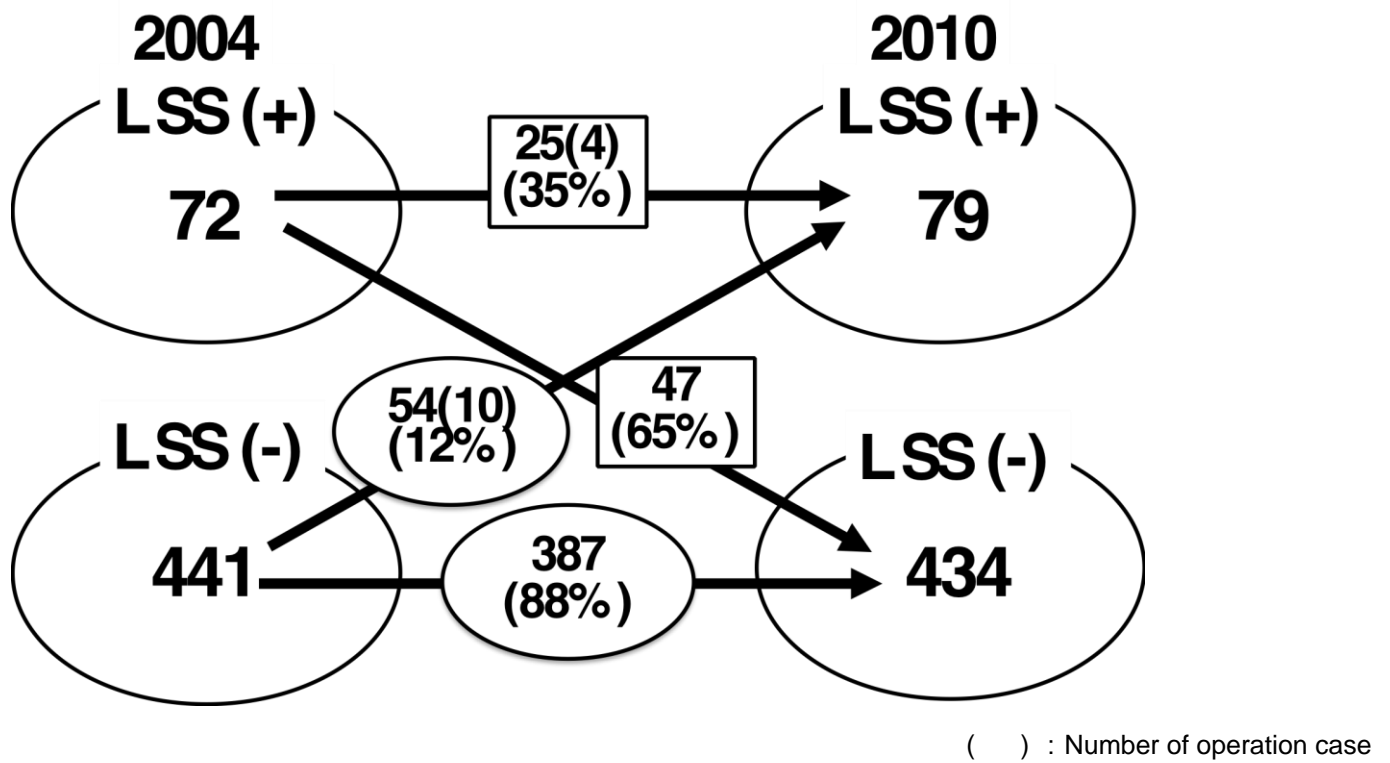

Table S1. Change of LSS-symptoms positive and LSS-symptoms negative groups by age;  
Subjects without either knee or hip or OA

| Age in 2004 | Change of LSS symptoms ( <i>n</i> = 513) |           |          |  |                        |            |          |
|-------------|------------------------------------------|-----------|----------|--|------------------------|------------|----------|
|             | LSS (+) in 2004 → 2010                   |           |          |  | LSS (-) in 2004 → 2010 |            |          |
|             | (+) → (+)                                | (+) → (-) | <i>n</i> |  | (-) → (+)              | (-) → (-)  | <i>n</i> |
| 40–49 y     | 1 (33.3)                                 | 2 (6.7)   | 3        |  | 2 (6.3)                | 30 (93.8)  | 32       |
| 50–59 y     | 5 (55.6)                                 | 4 (44.4)  | 9        |  | 7 (9.5)                | 67 (90.5)  | 74       |
| 60–69 y     | 9 (34.6)                                 | 17 (65.4) | 26       |  | 20 (10.4)              | 172 (89.6) | 192      |
| 70–79 y     | 10 (29.4)                                | 24 (70.6) | 34       |  | 25 (17.5)              | 118 (82.5) | 143      |

Abbreviations: LSS, lumbar spinal stenosis

Table S2. Change in RDQ scores of the subjects with/without LSS symptoms; Subjects without either knee or hip OA in 2004

| Change of LSS symptoms ( <i>n</i> =509) | 2004                      | 2010                      | p value |
|-----------------------------------------|---------------------------|---------------------------|---------|
| (+)→(+)                                 | 46.6 ± 7.9 <sup>(1)</sup> | 48.4 ± 7.9                | 0.3942  |
| (+)→(-)                                 | 49.8 ± 6.8 <sup>(1)</sup> | 53.5 ± 7.4                | 0.0520  |
| (-)→(+)                                 | 55.3 ± 6.5                | 52.4 ± 8.9 <sup>(2)</sup> | 0.1334  |
| (-)→(-)                                 | 56.4 ± 5.3                | 57.1 ± 6.3 <sup>(2)</sup> | <0.0001 |

Average ± SD (1); *p* < 0.05, (2); *p* < 0.0001

Abbreviations: LSS, lumbar spinal stenosis; RDQ, Roland-Morris Disability Questionnaire; SD, standard deviation

Table S3. Changes in eight domains of SF-36 of the subjects with/without LSS symptom;  
Subjects without either knee or hip OA in 2004

| Time course of LSS ( <i>n</i> = 509) |         | 2004                      | 2010                       | p value |
|--------------------------------------|---------|---------------------------|----------------------------|---------|
| PF                                   | (+)→(+) | 51.2 ± 9.4                | 45.8 ± 10.0                | 0.2135  |
|                                      | (+)→(-) | 52.6 ± 7.8                | 47.9 ± 11.0                | 0.0392  |
|                                      | (-)→(+) | 51.3 ± 11.4               | 45.8 ± 13.6 <sup>(5)</sup> | 0.0225  |
|                                      | (-)→(-) | 53.8 ± 8.4                | 52.5 ± 8.9 <sup>(5)</sup>  | 0.0085  |
| RP                                   | (+)→(+) | 45.9 ± 11.6               | 42.6 ± 9.5                 | 0.594   |
|                                      | (+)→(-) | 49.6 ± 10.2               | 49.4 ± 9.7                 | 0.9032  |
|                                      | (-)→(+) | 49.5 ± 10.3               | 46.0 ± 10.1 <sup>(3)</sup> | 0.264   |
|                                      | (-)→(-) | 51.9 ± 8.5                | 50.2 ± 9.7 <sup>(3)</sup>  | 0.1368  |
| BP                                   | (+)→(+) | 46.0 ± 8.9                | 42.2 ± 6.0 <sup>(1)</sup>  | 0.5147  |
|                                      | (+)→(-) | 45.4 ± 9.7                | 47.1 ± 8.1 <sup>(1)</sup>  | 0.3458  |
|                                      | (-)→(+) | 42.1 ± 7.7                | 45.3 ± 8.3 <sup>(4)</sup>  | 0.4802  |
|                                      | (-)→(-) | 52.7 ± 9.3                | 52.0 ± 9.4 <sup>(4)</sup>  | 0.4522  |
| GH                                   | (+)→(+) | 48.2 ± 8.3                | 44.5 ± 8.5                 | 0.0929  |
|                                      | (+)→(-) | 49.1 ± 9.5                | 48.0 ± 6.4                 | 0.9255  |
|                                      | (-)→(+) | 50.4 ± 8.0 <sup>(1)</sup> | 48.7 ± 7.9 <sup>(2)</sup>  | 0.2569  |
|                                      | (-)→(-) | 52.6 ± 8.9 <sup>(1)</sup> | 51.8 ± 9.5 <sup>(2)</sup>  | 0.314   |
| VT                                   | (+)→(+) | 48.7 ± 7.3                | 47.0 ± 6.8                 | 0.7671  |
|                                      | (+)→(-) | 49.0 ± 10.3               | 49.4 ± 8.8                 | 0.7089  |
|                                      | (-)→(+) | 50.3 ± 11.0               | 50.4 ± 8.0                 | 0.8101  |
|                                      | (-)→(-) | 55.1 ± 8.0                | 51.8 ± 8.7                 | <0.0001 |
| SF                                   | (+)→(+) | 48.5 ± 13.6               | 46.9 ± 9.8                 | 0.2604  |
|                                      | (+)→(-) | 50.4 ± 8.3                | 48.3 ± 10.4                | 0.1442  |
|                                      | (-)→(+) | 48.9 ± 11.7               | 49.0 ± 8.9                 | 0.4254  |
|                                      | (-)→(-) | 51.8 ± 8.9                | 50.5 ± 9.2                 | 0.1663  |
| RE                                   | (+)→(+) | 49.4 ± 11.9               | 44.9 ± 7.0                 | 0.3743  |
|                                      | (+)→(-) | 49.0 ± 11.0               | 48.7 ± 10.3                | 0.7825  |
|                                      | (-)→(+) | 46.8 ± 12.7               | 46.4 ± 10.6 <sup>(2)</sup> | 0.7982  |
|                                      | (-)→(-) | 52.2 ± 7.9                | 50.8 ± 9.1 <sup>(2)</sup>  | 0.5126  |
| MH                                   | (+)→(+) | 47.5 ± 3.0                | 46.1 ± 12.3                | 0.6165  |
|                                      | (+)→(-) | 46.4 ± 10.2               | 48.4 ± 9.7                 | 0.3252  |
|                                      | (-)→(+) | 49.2 ± 8.9                | 49.1 ± 9.8                 | 0.9711  |
|                                      | (-)→(-) | 50.4 ± 9.3                | 51.7 ± 8.5                 | 0.0381  |

Average ± SD (1) *p* < 0.05, (2) *p* < 0.01, (3) *p* < 0.005, (4) *p* < 0.001, (5) *p* < 0.0001

Abbreviations: LSS, lumbar spinal stenosis; SF-36, The 36-Item Short Form Health Survey; SD, standard deviation; PF, physical functioning; RP, role-physical; BP, bodily pain; GH, general health perception; VT, vitality; SF, social functioning; RE, role-emotional; MH, mental health.

Table S4. Predictive factors for LSS-symptom presence at the end of six-year follow-up period; Subjects without either knee or hip OA in 2004

|                        |                   | OR                     | 95%CI        | p value |
|------------------------|-------------------|------------------------|--------------|---------|
| Gender                 | Female            | 0.787                  | 0.417–1.485  | 0.4597  |
| Age                    | 40–49 y           |                        | Reference    |         |
|                        | 50–59 y           | 1.628                  | 0.381–6.954  | 0.5107  |
|                        | 60–69 y           | 1.593                  | 0.420–6.044  | 0.4935  |
|                        | 70–79 y           | 2.558                  | 0.677–9.668  | 0.1661  |
| BMI                    | < 18.5            |                        | Reference    |         |
|                        | 18.5–25.0         | 1.297                  | 0.353–4.764  | 0.695   |
|                        | 25.1–30.0         | 0.788                  | 0.197–3.163  | 0.7373  |
|                        | 30 <              | 3.631×10 <sup>-6</sup> | –            | 0.9756  |
| LSS symptoms           | Positive          | 2.438                  | 1.126–5.280  | 0.0238  |
| RDQ score (Norm-based) | < 50              | 2.421                  | 1.171–5.006  | 0.0171  |
| Knee OA                | Positive          | –                      | –            | –       |
| Hip OA                 | Positive          | –                      | –            | –       |
| Comorbidities          | Respiratory       | 4.618×10 <sup>-6</sup> | –            | 0.9883  |
|                        | Diabetes Mellitus | 0.613                  | 0.122–3.082  | 0.5521  |
|                        | Cardiovascular    | 2.658                  | 1.077–6.561  | 0.0339  |
|                        | Cerebrovascular   | 3.021                  | 0.131–69.394 | 0.4893  |
|                        | Hypertension      | 1.104                  | 0.596–2.044  | 0.7538  |
| Smoking                | Pack-Year ≥ 20    | 1.374                  | 0.715–2.639  | 0.3406  |
| Depressive symptoms    | None              |                        | Reference    |         |
|                        | Mild              | 1.129                  | 0.475–2.682  | 0.7834  |
|                        | Moderate          | 0.883                  | 0.305–2.555  | 0.8181  |
|                        | Severe            | 1.168                  | 0.425–3.208  | 0.763   |

Abbreviations: LSS, lumbar spinal stenosis; BMI, body mass index; RDQ, Roland-Morris

Disability Questionnaire; OA, osteoarthritis

Table S5. Risk ratio of leg symptoms resulting in LSS development during the six-year follow-up period; Subjects without either knee or hip OA in 2004

| Initial analysis     |     | Development of LSS at six-year follow-up |         |
|----------------------|-----|------------------------------------------|---------|
|                      |     | LSS (+)                                  | LSS (-) |
| Leg symptoms in 2004 | (+) | 50                                       | 135     |
|                      | (-) | 4                                        | 252     |

Abbreviations: LSS, lumbar spinal stenosis

Table S6. Predictive factors of the operation for LSS during the six-year follow-up period;  
Subjects without either knee or hip OA in 2004

|                        |                   | OR                     | 95%CI        | p value |
|------------------------|-------------------|------------------------|--------------|---------|
| Gender                 | Female            | 1.023                  | 0.252–4.147  | 0.9746  |
| Age                    | 40–49 y           |                        |              |         |
|                        | 50–59 y           | 0.187                  | 0.015–2.381  | 0.1963  |
|                        | 60–69 y           | 0.166                  | 0.021–1.293  | 0.0864  |
|                        | 70–79 y           | 0.392                  | 0.054–2.833  | 0.4289  |
| BMI                    | < 18.5            |                        | Reference    |         |
|                        | 18.5–25.0         | 9.534×10 <sup>6</sup>  | –            | 0.9892  |
|                        | 25.1–30.0         | 1.449×10 <sup>6</sup>  | –            | 0.9889  |
|                        | 30 <              | 2.058                  | –            | 0.9997  |
| LSS symptoms           | Positive          | 3.159                  | 0.617–16.182 | 0.1676  |
| RDQ score (Norm-based) | <50               | 0.683                  | 0.107–4.362  | 0.6872  |
| Knee OA                | Positive          | –                      | –            | –       |
| Hip OA                 | Positive          | –                      | –            | –       |
| Comorbidities          | Respiratory       | 2.490×10 <sup>-6</sup> | –            | 0.997   |
|                        | Diabetes Mellitus | 1.647×10 <sup>-6</sup> | –            | 0.9908  |
|                        | Cardiovascular    | 1.034                  | 0.119–8.975  | 0.9757  |
|                        | Cerebrovascular   | 9.103×10 <sup>-6</sup> | –            | 0.9973  |
|                        | Hypertension      | 1.553                  | 0.401–6.018  | 0.5243  |
| Smoking                | Pack-Year ≥ 20    | 1.579                  | 0.376–6.632  | 0.5328  |
| Depressive symptoms    | None              |                        | Reference    |         |
|                        | Mild              | 4.04                   | 0.886–18.417 | 0.0828  |
|                        | Moderate          | 2.42×10 <sup>-6</sup>  | –            | 0.9859  |
|                        | Severe            | 2.598                  | 0.432–15.616 | 0.3808  |

Abbreviations: LSS, lumbar spinal stenosis; BMI, body mass index; RDQ, Roland-Morris

Disability Questionnaire; OA, osteoarthritis
